# Supplementary material for: Photoresponsive supramolecular self-assembly of monofunctionalized pillar[5]arene based on stiff stilbene
Source: Royal Society of Chemistry journal article supplement (doi:10.1039/c4cc02760d), 2014-01-01
Supplement: c4cc02760d1.pdf [file c4cc02760d1.pdf]

## *Electronic Supplementary Information*

### **Photoresponsive supramolecular self-assembly of monofunctionalized pillar[5]arene based on stiff stilbene**

Yuan Wang,<sup>+ab</sup> Jiang-Fei Xu,<sup>+ab</sup> Yu-Zhe Chen,<sup>a</sup> Li-Ya Niu,<sup>a</sup> Li-Zhu Wu,<sup>a</sup> Chen-Ho Tung<sup>a</sup> and Qing-Zheng Yang<sup>\*a</sup>

<sup>a</sup> Key Laboratory of Photochemical Conversion and Optoelectronic Materials, Technical Institute of Physics and Chemistry, Chinese Academy of Sciences, Beijing 100190, China.

<sup>b</sup> University of the Chinese Academy of Sciences, Beijing 100049, China.

<sup>+</sup> These authors contributed equally to this work.

### **Contents**

|                                                      |     |
|------------------------------------------------------|-----|
| 1. Materials and methods.                            | S2  |
| 2. Synthesis of compound <b>Z-1</b> and <b>E-1</b> . | S3  |
| 3. <sup>1</sup> H NMR spectra of <b>E-2</b> .        | S13 |
| 4. <sup>1</sup> H NMR spectra of <b>Z-1</b> at 5 mM. | S14 |
| 5. 2-D COSY spectra of <b>Z-1</b> at 150 mM.         | S15 |
| 6. DOSY spectra of <b>Z-1</b> at 5-150 mM.           | S16 |
| 7. DOSY spectra of <b>E-1</b> at 5-150 mM.           | S18 |
| 8. DOSY spectra of <b>E-2</b> at 5-150 mM.           | S20 |
| 9. Reference.                                        | S22 |

## **1. Materials and methods.**

Unless otherwise noted, materials were obtained from commercial suppliers and were used without further purification. NMR spectra were recorded with a Bruker Avance 400 spectrometer or a Bruker Avance 600 spectrometer. High-resolution mass spectrometry experiments were performed with a Bruker Daltonics Apex IV spectrometer. The photoisomerization reactions were carried out by using a xenon lamp (500 W) with filter. Viscosity measurements were carried out with a micro-Ubbelohde dilution viscometer at 18°C in chloroform.

## 2. Synthesis of compound Z-1 and E-1.

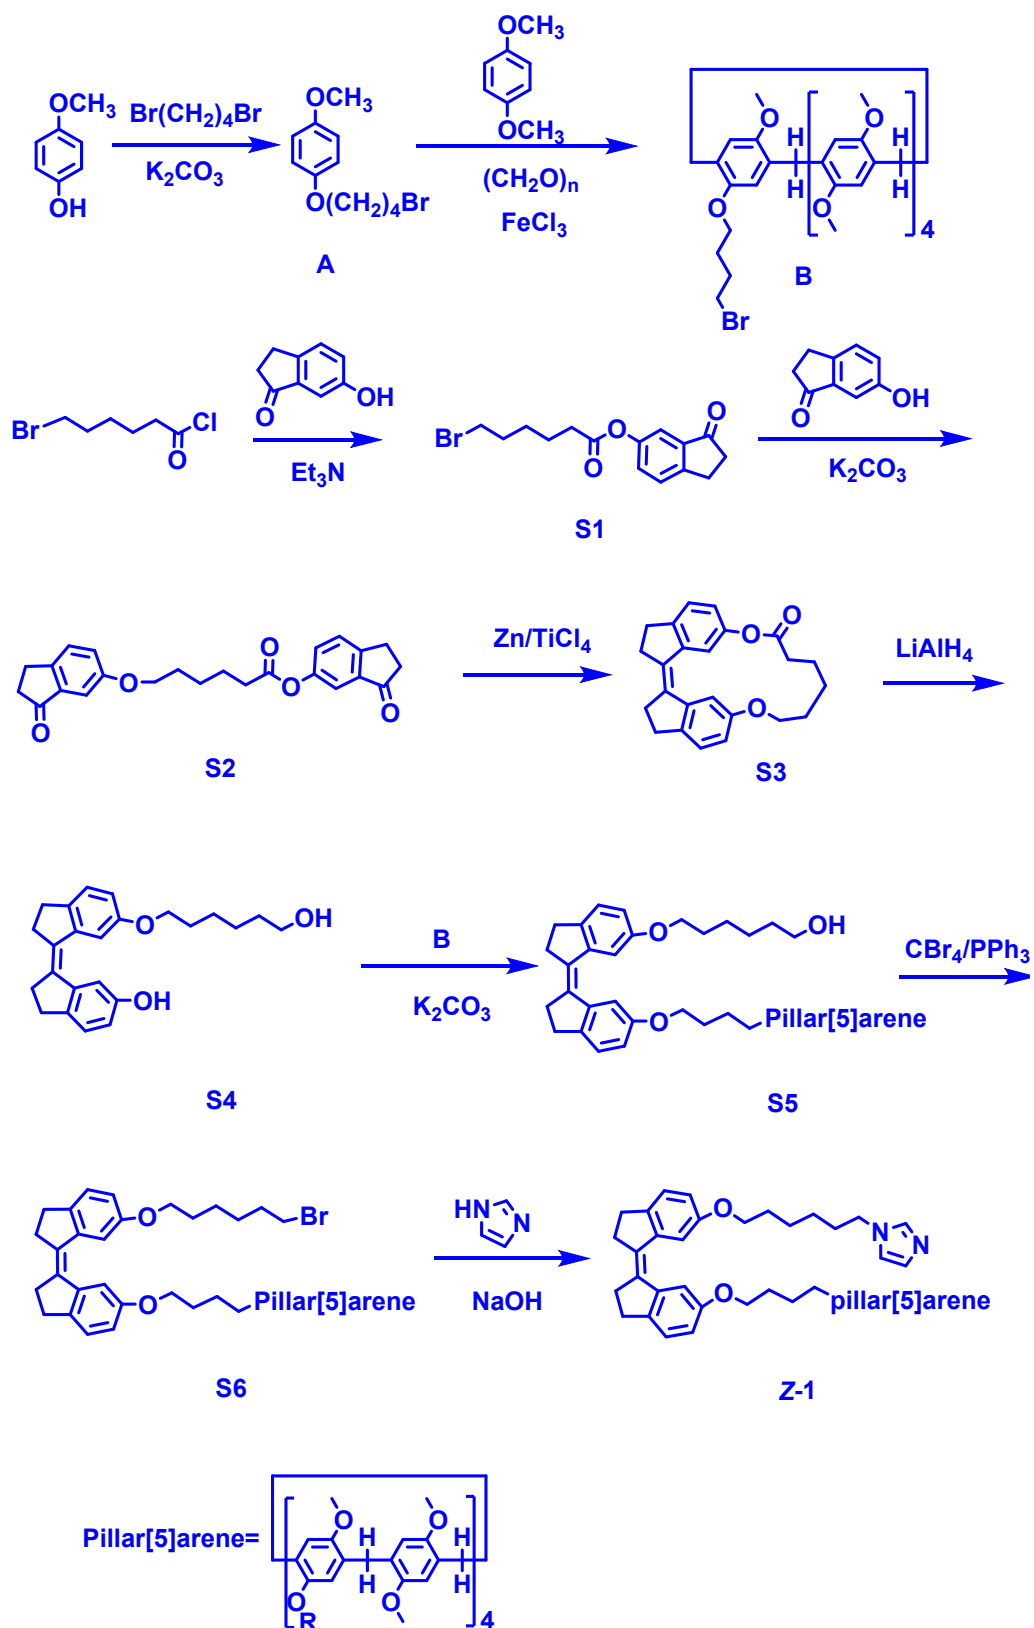

Scheme S1. Synthesis of compound Z-1

### Preparation of compound A.

To a stirred solution of 1,4-dibromobutane (6.47 g, 30 mmol) in acetone (150 mL) was added  $\text{K}_2\text{CO}_3$  (4.14 g, 30 mmol) and 4-methylbenzophenone (0.62 g, 5 mmol) and the mixture was stirred at 70 °C overnight. After the reaction was completed, the solid was removed by filtration and the solvent was removed under reduced pressure to afford 1.2 g of product. Yield: 92%.  $^1\text{H}$  NMR ( $\text{CDCl}_3$ , 400 MHz):  $\delta$  6.83 (s, 4H), 3.95 (t, 2H,  $J = 6$  Hz), 3.77 (s, 3H), 3.49 (t, 2H,  $J = 6.8$  Hz), 2.07 (m, 2H), 1.92 (m, 2H).

### Preparation of compound B.

To a solution of **A** (0.26 g, 1 mmol), 1,4-dimethoxybenzene (2.21 g, 16 mmol) and paraformaldehyde (1.5 g, 50 mmol) in dry  $\text{CH}_2\text{Cl}_2$  (500 mL) under  $\text{N}_2$  atmosphere for 0.5 h, then anhydrous  $\text{FeCl}_3$  (0.41 g, 2.5 mmol) was added. The mixture was stirred at room temperature under  $\text{N}_2$  atmosphere for 5 h. After the reaction was completed, the resulting mixture was washed with water, brine and dried over  $\text{Na}_2\text{SO}_4$ . Evaporation of the solvent under reduced pressure and further purification was carried out by column chromatography using  $\text{CH}_2\text{Cl}_2$  as eluent to afford 0.42 g of product as a white solid. Yield: 48%.  $^1\text{H}$  NMR ( $\text{CDCl}_3$ , 400 MHz):  $\delta$  6.83-6.72 (m, 10H), 3.77-3.63 (m, 39H), 3.08 (br, 2H), 1.69 (br, 2H), 1.25 (br, 2H).

### Preparation of compound S1.

To a solution of 6-hydroxy-1-indanone (1.0 g, 6.76 mmol) in dry THF (200 mL) was added triethylamine (1.4 mL, 1.02 g, 10.2 mmol) and 6-bromohexanoyl chloride (1.73 g, 8.1 mmol), then the mixture was stirred at room temperature for 3 h. After the reaction was completed, the resulting mixture was washed with aqueous  $\text{K}_2\text{CO}_3$  and dried over  $\text{Na}_2\text{SO}_4$ . The solution was removed under reduced pressure to afford 1.87 g of product. Yield: 90%.  $^1\text{H}$  NMR ( $\text{CDCl}_3$ , 400 MHz):  $\delta$  7.49 (d, 1H,  $J = 8.4$  Hz), 7.44 (d, 1H,  $J = 2$  Hz), 7.31 (dd, 1H,  $J = 8.4$  Hz, 2 Hz), 3.44 (t,

2H,  $J = 6.8$  Hz), 3.13 (t, 2H,  $J = 5.6$  Hz), 2.73 (t, 2H,  $J = 5.6$  Hz), 2.60 (t, 2H,  $J = 7.2$  Hz), 1.93 (m, 2H), 1.79 (m, 2H), 1.56 (m, 2H).

### Preparation of compound S2.

To a solution of **S1** (1.87 g, 5.8 mmol) of DMF (9 mL) was added 6-hydroxyindanone (0.85 g, 5.8 mmol) and  $K_2CO_3$  (2.38 g, 17.3 mmol), then the mixture was stirred at 60 °C overnight. After the reaction was completed, ethyl acetate (200 mL) was added and the organic layer was washed with brine and dried over  $Na_2SO_4$ . The solvent was removed under reduced pressure and the further purification was carried out by column chromatography using  $CH_2Cl_2/Et_2O$  (100:1, v/v) as eluent to afford 0.97 g product. Yield: 40%.  $^1H$  NMR ( $CDCl_3$ , 400 MHz):  $\delta$  7.49 (d, 1H,  $J = 8.4$  Hz), 7.44 (d, 1H,  $J = 2.0$  Hz), 7.37 (d, 1H,  $J = 8.4$  Hz), 7.30 (dd, 1H,  $J = 8.4$  Hz, 2.0 Hz), 7.19 (d, 1H,  $J = 2$  Hz), 7.17 (dd, 1H,  $J = 8.4$  Hz, 2 Hz), 4.02 (t, 2H,  $J = 6.4$  Hz), 3.13 (t, 2H,  $J = 6.0$  Hz), 3.06 (t, 2H,  $J = 5.6$  Hz), 2.72 (m, 4H), 2.62 (t, 2H,  $J = 7.2$  Hz), 1.85 (m, 4H), 1.61 (m, 2H).

### Preparation of compound S3.

To a stirred suspension of zinc powder (4.6 g, 70 mmol) in 120 mL dry THF,  $TiCl_4$  (2.6 mL, 4.5 g, 23.5 mmol) was added over 2 min at 0 °C. The resulting slurry was heated at reflux for 3 h, and pyridine (1 mL, 0.95 g, 12 mmol) was added. A THF solution (50 mL) of **S2** (0.92 g, 2.35 mmol) was added over a 5 h period by syringe pump to the refluxing reaction mixture. The reflux was continued for 0.5 h after the addition was completed. Upon cooling to room temperature, the reaction mixture was poured into saturated aqueous  $K_2CO_3$  (100 mL) and stirred until the organic phase was separated. The combined organic phase was evaporated under reduced pressure,  $CH_2Cl_2$  (100 mL) was added and washed with water. The organic phase was dried over  $Na_2SO_4$  and the solvent was removed under reduced pressure to afford 0.62 g of product. Yield: 73%.  $^1H$  NMR ( $CDCl_3$ , 400 MHz):  $\delta$  7.82 (d, 1H,  $J = 2.0$  Hz), 7.58 (d, 1H,  $J = 2$  Hz), 7.24 (d, 1H,  $J = 8$  Hz), 7.17 (d, 1H,  $J = 8$  Hz), 6.91

(dd, 1H,  $J = 8$  Hz, 2 Hz), 6.80 (dd, 1H,  $J = 8$  Hz, 2 Hz), 4.09 (t, 2H,  $J = 5.6$  Hz), 2.97 (t, 2H,  $J = 6.8$  Hz), 2.89 (t, 2H,  $J = 6.8$  Hz), 2.80 (m, 4H), 2.54 (t, 2H,  $J = 6.0$  Hz), 1.83 (m, 2H), 1.69 (m, 4H).

#### **Preparation of compound S4.**

To a stirred solution of **S3** (0.59 g, 1.63 mmol) in dry THF (100 mL) was added  $\text{LiAlH}_4$  (0.34 g, 8 mmol) cautiously and the resulting mixture was stirred overnight. The reaction was quenched with methanol and the solid was removed by filtration. The filtrate was concentrated to a small volume,  $\text{CH}_2\text{Cl}_2$  (100 mL) was added and under reduced pressure and further purification was carried out by column chromatography using  $\text{CH}_2\text{Cl}_2/\text{CH}_3\text{OH}$  (100:1, v/v) as eluent to afford 0.45 g of product. Yield: 80%.  $^1\text{H}$  NMR ( $\text{CDCl}_3$ , 400 MHz):  $\delta$  7.65 (d, 1H,  $J = 2.0$  Hz), 7.57 (d, 1H,  $J = 2$  Hz), 7.17 (d, 1H,  $J = 8.4$  Hz), 7.14 (d, 1H,  $J = 8.0$  Hz), 6.75 (dd, 1H,  $J = 8.0$  Hz, 2.0 Hz), 6.76 (dd, 1H,  $J = 8.0$  Hz, 2.4 Hz), 6.44 (s, 1H), 3.97 (t, 2H,  $J = 6.6$  Hz), 3.72 (m, 2H), 2.89 (m, 4H), 2.81 (m, 4H), 1.82 (m, 2H), 1.60 (m, 2H), 1.51 (m, 4H).

#### **Preparation of compound S5.**

A solution of **S4** (0.45 g, 1.23 mmol), **B** (1.74 g, 2 mmol), and potassium phthalimide (0.55 g, 4 mmol) in 10 mL DMF was heated at 60 °C overnight. After the reaction was completed, 120 mL of brine was added and then extracted with EtOAc (50 mL, 3 times), the combined organic phase was washed with brine and dried over  $\text{Na}_2\text{SO}_4$ . Evaporation of the solvent under reduced pressure and the further purification was carried out by column chromatography using  $\text{CH}_2\text{Cl}_2/\text{Et}_2\text{O}$  (100/1, v/v) as eluent to afford 0.9 g of product. Yield: 64%.  $^1\text{H}$  NMR ( $\text{CDCl}_3$ , 400 MHz):  $\delta$  7.69 (d, 1H,  $J = 3.2$  Hz), 7.60 (d, 1H,  $J = 1.6$  Hz), 7.24 (d, 1H,  $J = 8$  Hz), 7.21 (d, 1H,  $J = 8.4$  Hz), 6.95-6.75 (m, 12H), 4.05 (t, 2H,  $J = 6$  Hz), 3.95 (t, 2H,  $J = 6.2$  Hz), 3.79-3.64 (m, 37H), 3.48 (t, 2H,  $J = 6.6$  Hz), 2.97 (t, 4H,  $J = 6.4$  Hz), 2.85 (t, 4H,  $J = 6.2$  Hz), 2.08 (m, 4H), 1.85 (m, 2H), 0.66 (m, 2H), 0.18 (t, 1H,  $J = 6.4$  Hz), -0.74 (m, 2H), -1.68 (m, 2H), -2.15 (m, 2H).  $^{13}\text{C}$  NMR ( $\text{CDCl}_3$ , 100MHz):  $\delta$  157.98, 157.53, 150.54,

150.48, 150.45, 150.38, 150.02, 141.89, 141.71, 140.96, 140.50, 135.78, 135.43, 128.68, 128.48, 128.45, 128.40, 128.36, 128.34, 128.32, 128.24, 125.93, 125.69, 116.22, 114.95, 114.01, 113.84, 113.63, 113.45, 113.40, 113.38, 113.33, 113.24, 109.37, 108.83, 69.36, 68.26, 67.82, 62.99, 55.86, 55.80, 55.55, 55.52, 55.50, 55.48, 55.43, 35.55, 35.49, 30.42, 30.05, 29.30, 29.27, 29.24, 29.17, 26.89, 26.17, 25.13, 22.51. HR-ESI-MS:  $m/z$  calcd for  $[M+H]^+$   $C_{72}H_{83}O_{13}$ : 1155.58282; found: 1155.58386, error: -0.9 ppm.

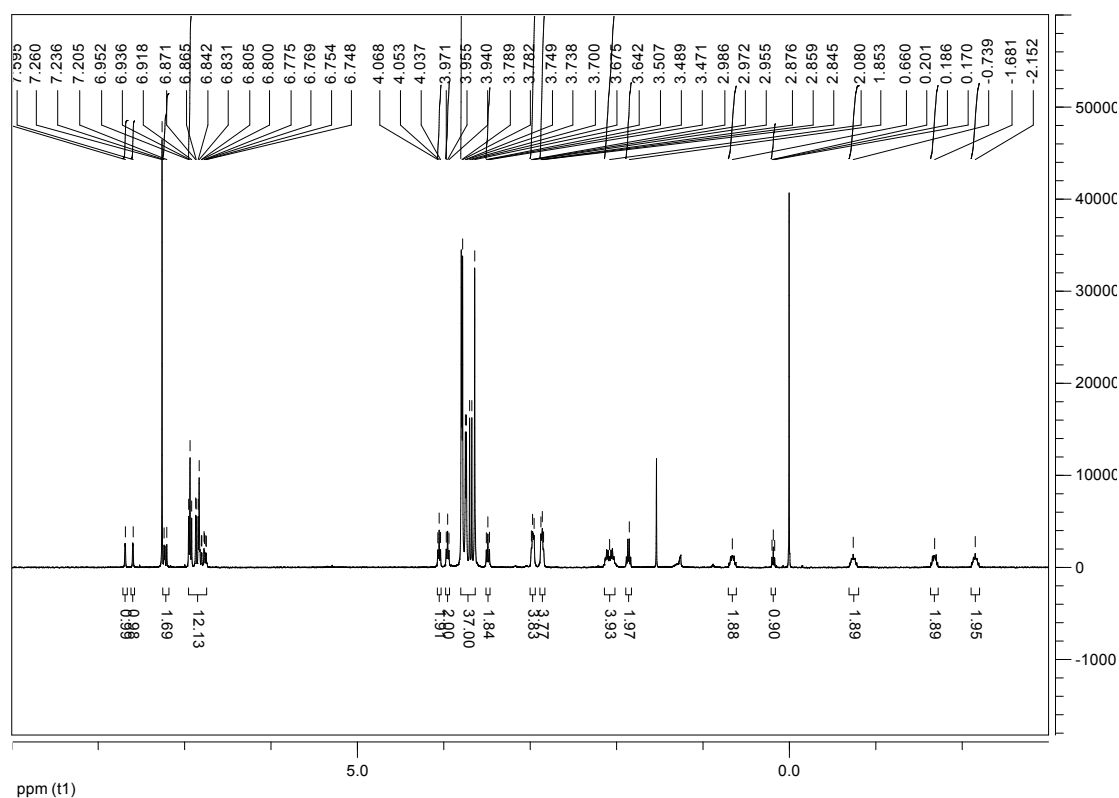

Figure S2(a).  $^1H$  NMR spectra of **S5** ( $CDCl_3$ , 400 MHz).

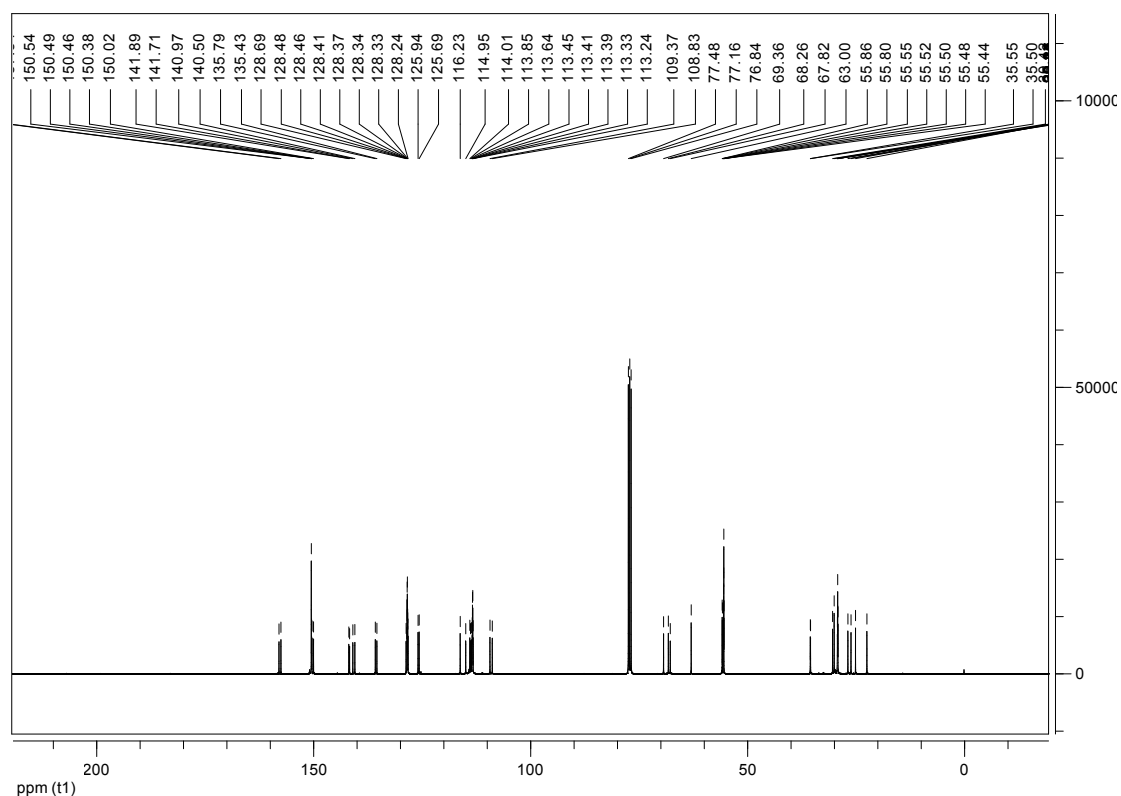

Figure S2(b).  $^{13}\text{C}$  NMR spectra of **S5** ( $\text{CDCl}_3$ , 100 MHz).

### Preparation of compound **S6**.

To a stirred solution of **S5** (0.8 g, 0.7 mmol) in 5 mL dry  $\text{CH}_2\text{Cl}_2$  containing 10 drops of acetone,  $\text{CBr}_4$  (0.46 g, 1.4 mmol) and  $\text{PPh}_3$  (0.37 g, 1.4 mmol) was added in sequence. The resulting mixture was stirred for 10 min and then purified immediately with column chromatography eluting with petroleum ether/ $\text{CH}_2\text{Cl}_2$ / $\text{Et}_2\text{O}$  (10:10:1, v/v/v) to afford 0.72 g of product. Yield: 85%.  $^1\text{H}$  NMR ( $\text{CDCl}_3$ , 400 MHz):  $\delta$  7.72 (d, 1H,  $J$  = 1.6 Hz), 7.64 (d, 1H,  $J$  = 1.6 Hz), 7.28 (d, 1H,  $J$  = 8.4 Hz), 7.22 (d, 1H,  $J$  = 8.4 Hz), 6.96-6.75 (m, 12H), 4.08 (t, 2H,  $J$  = 6 Hz), 3.95 (t, 2H,  $J$  = 6.2 Hz), 3.84-3.63 (m, 37H), 3.41 (t, 2H,  $J$  = 7.6 Hz), 2.96 (t, 4H,  $J$  = 6.4 Hz), 2.86 (t, 4H,  $J$  = 6.4 Hz), 2.07 (m, 4H), 1.38 (m, 2H), 0.63 (m, 2H), -0.91 (m, 2H), -1.13 (m, 2H), -1.92 (m, 2H).  $^{13}\text{C}$  NMR ( $\text{CDCl}_3$ , 100MHz):  $\delta$  157.91, 157.43, 150.71, 150.57, 150.40, 150.35, 150.31, 149.92, 141.83, 141.65, 140.92, 140.42, 135.85, 135.37, 128.83, 128.66, 128.44, 128.35, 128.30, 128.24, 128.19, 128.18, 128.15, 128.03, 125.92, 125.56, 116.18, 114.64, 114.57, 113.93, 113.46, 113.33, 113.09, 112.97, 112.92, 112.89, 112.87, 110.66, 108.87, 68.71, 68.12, 67.89, 56.56, 56.15, 55.59, 55.45, 55.39, 55.37, 35.49, 35.42, 33.45, 31.93, 30.00, 29.92, 29.41, 29.26,



29.21, 29.16, 29.11, 26.86, 26.76, 26.20, 23.21. HR-ESI-MS:  $m/z$  calcd for  $M^+ C_{72}H_{81}BrO_{12}$ : 1216.49059; found: 1216.49303, error: -2.0 ppm.

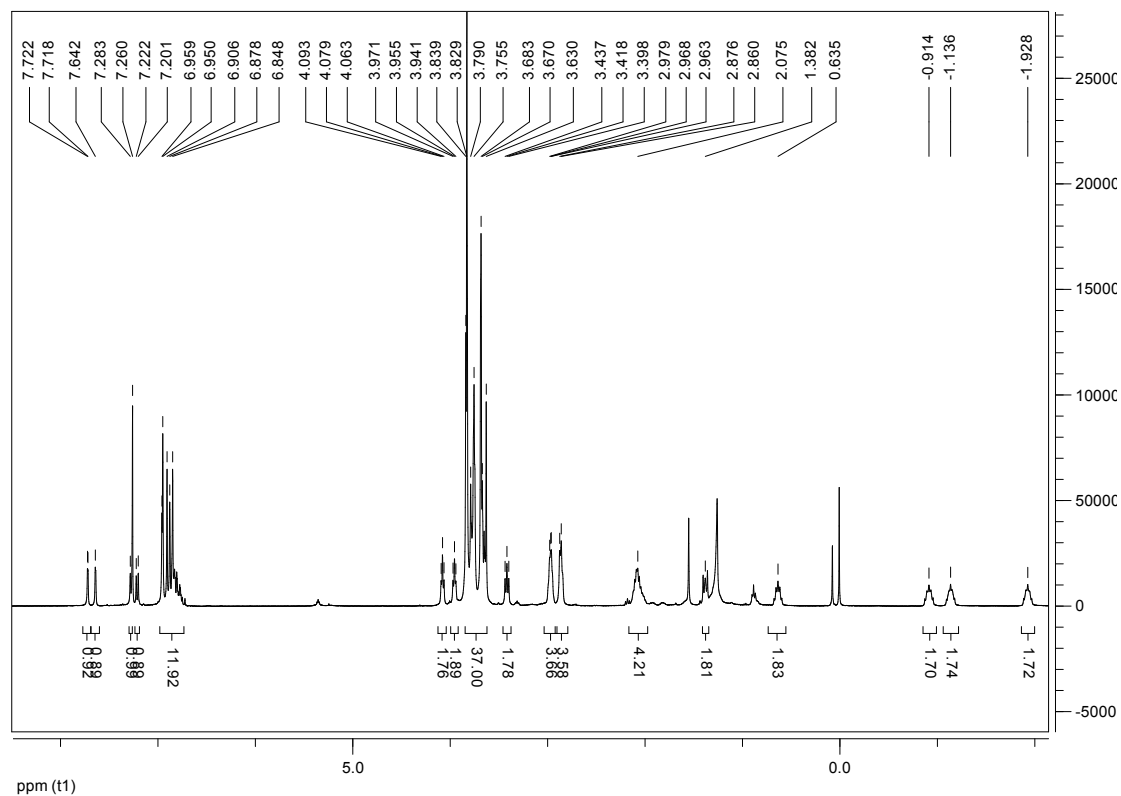

Figure S3(a).  $^1H$  NMR spectra of **S6** ( $CDCl_3$ , 400 MHz).

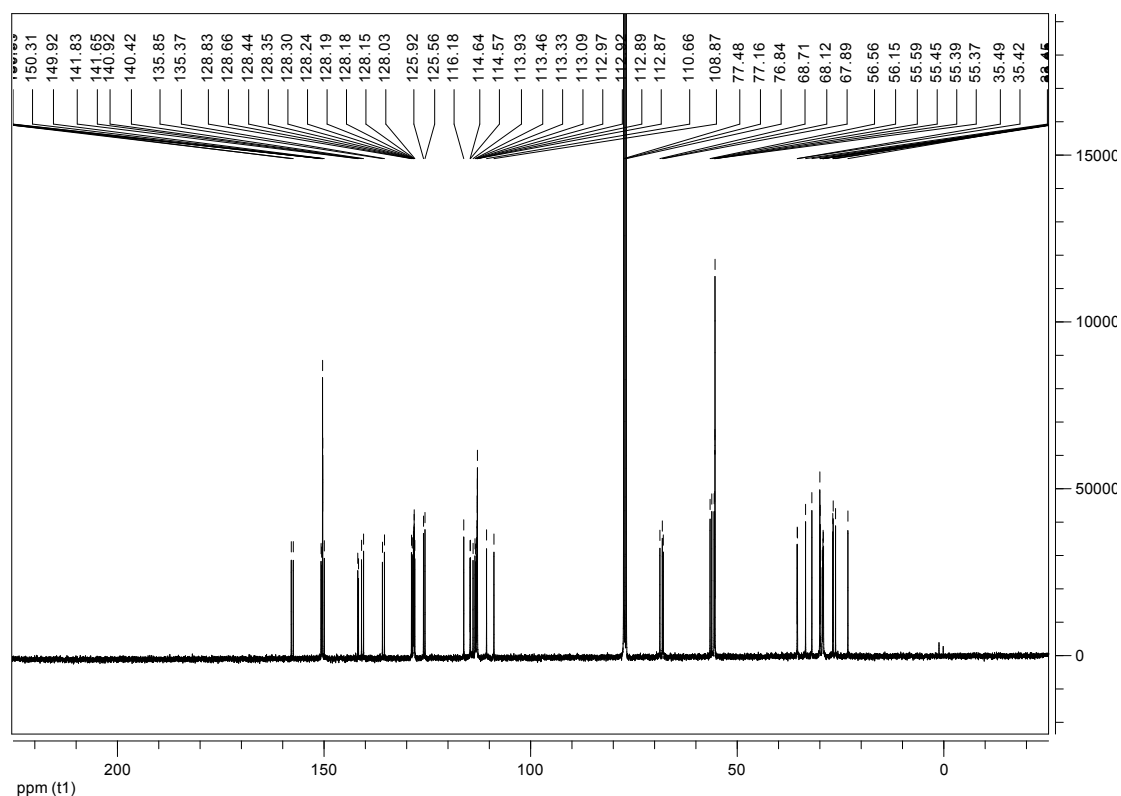

Figure S3(b).  $^{13}\text{C}$  NMR spectra of **S6** ( $\text{CDCl}_3$ , 100 MHz).

### Preparation of compound **Z-1**.

A mixture of imidazole (0.37 g, 5.4 mmol) and NaOH (86.4 mg, 2.16 mmol) in DMF (7 mL) was heated at 60 °C for 2 h, and then **S5** (656.4 mg, 0.54 mmol) was added. The mixture was maintained at 60 °C for 40 min. Upon cooling to room temperature, 120 mL brine was added and then extracted with EtOAc (50 mL, 3 times), the combined organic phase was washed with brine and dried over  $\text{Na}_2\text{SO}_4$ . Evaporation of the solvent under reduced pressure and the further purification was carried out by column chromatography using  $\text{CH}_2\text{Cl}_2/\text{CH}_3\text{OH}$  (50:1) as eluent to afford 631.8 mg of **Z-1**. Yield: 97%.  $^1\text{H}$  NMR ( $\text{CDCl}_3$ , 400 MHz):  $\delta$  7.72 (d, 1H,  $J = 2$  Hz), 7.69 (d, 1H,  $J = 2$  Hz), 7.26 (d, 1H,  $J = 8.4$  Hz), 7.22 (d, 1H,  $J = 8.4$  Hz), 6.98-6.69 (m, 14H), 6.09 (s, 1H), 4.10 (m, 3H), 3.08 (m, 1H), 3.76-3.54 (m, 39H), 2.95 (t, 4H,  $J = 5.8$  Hz), 2.85 (t, 4H,  $J = 6$  Hz), 2.09 (m, 4H), 1.16 (br, 2H), 0.84 (br, 2H), -0.13 (br, 2H), -1.13 (br, 2H), -1.5 (br, 2H).  $^{13}\text{C}$  NMR ( $\text{CDCl}_3$ , 100MHz):  $\delta$  157.79, 157.49, 150.63, 150.57, 150.50, 150.48, 150.45, 150.42, 150.22, 141.85,

141.67, 141.00, 140.71, 136.56, 135.75, 135.54, 128.86, 128.79, 128.73, 128.61, 128.56, 128.55, 128.42, 128.21, 127.19, 125.87, 125.73, 118.93, 115.38, 115.25, 114.55, 114.01, 113.95, 113.83, 113.78, 113.64, 113.49, 113.45, 113.43, 109.71, 109.62, 68.72, 68.54, 68.27, 56.33, 55.81, 55.77, 55.71, 55.63, 55.60, 55.58, 45.23, 35.48, 35.45, 30.90, 29.98, 29.69, 29.36, 29.06, 28.97, 27.14, 27.09, 26.37, 24.29. HR-ESI-MS:  $m/z$  calcd for  $[M+H]^+$   $C_{75}H_{85}N_2O_{12}$ : 1205.60970; found: 1205.61012, error: -0.3 ppm.

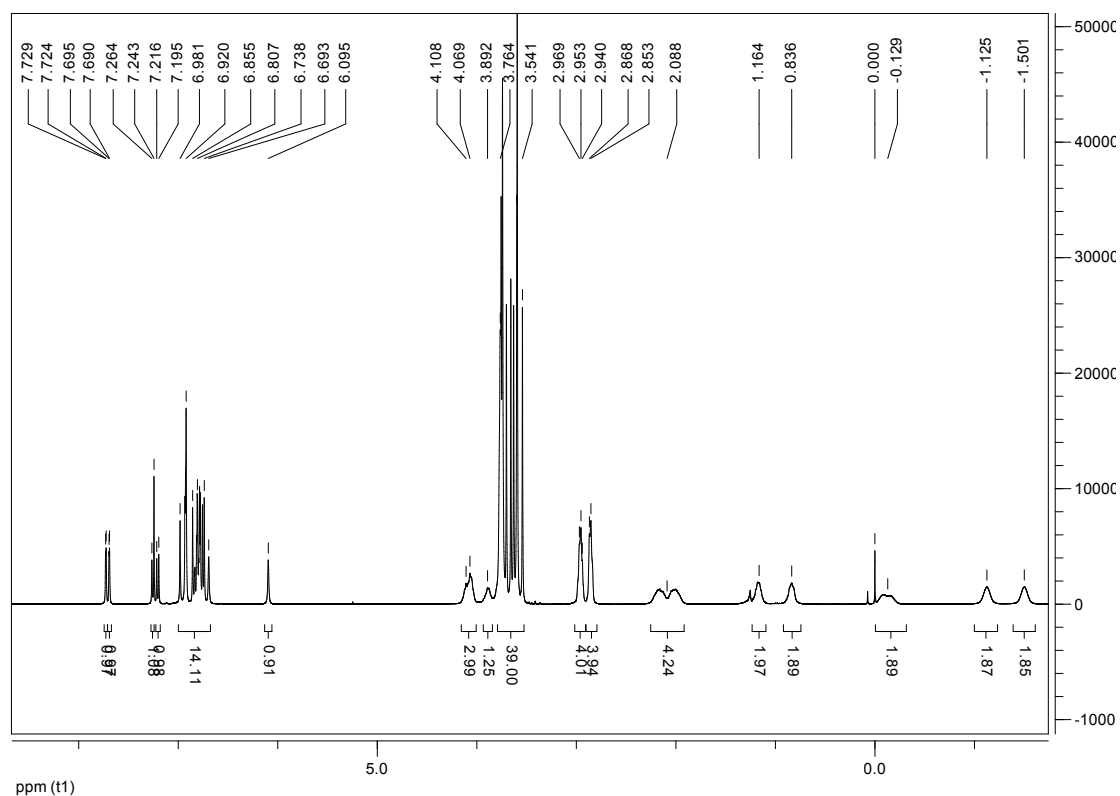

Figure S4(a).  $^1H$  NMR spectra of Z-1 ( $CDCl_3$ , 400 MHz).

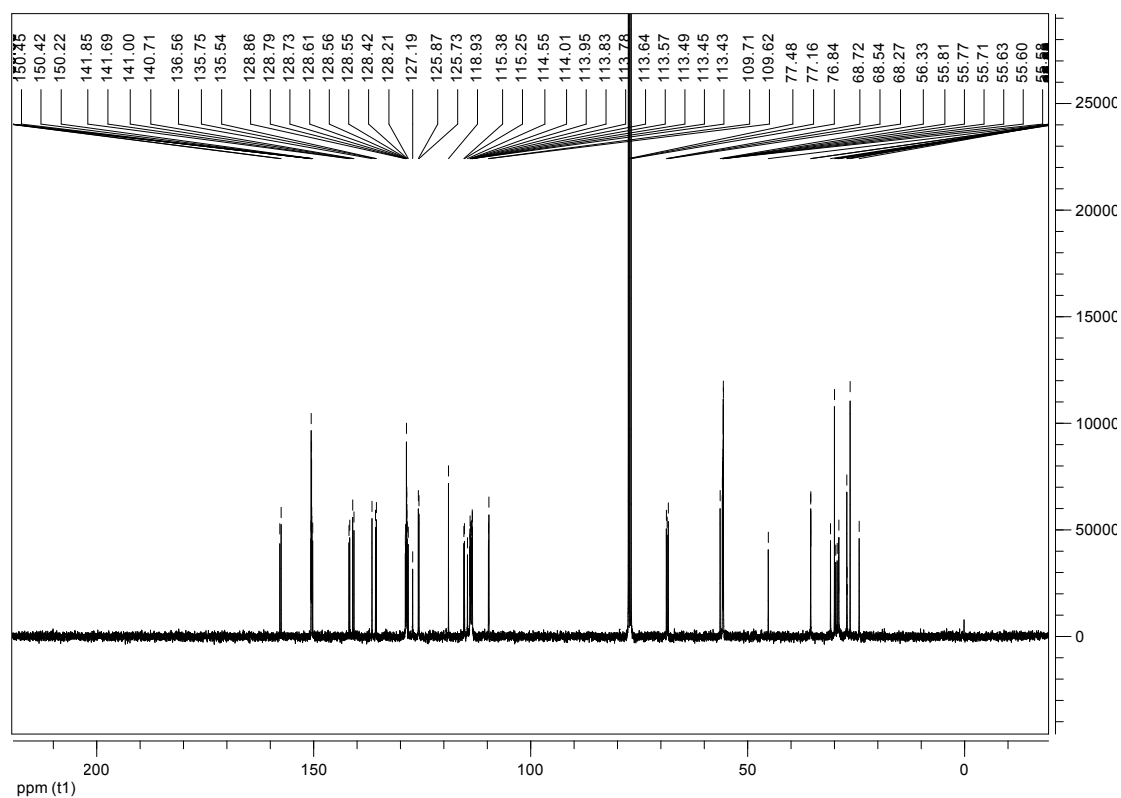

Figure S4(b).  $^{13}\text{C}$  NMR spectra of Z-1 ( $\text{CDCl}_3$ , 100 MHz).

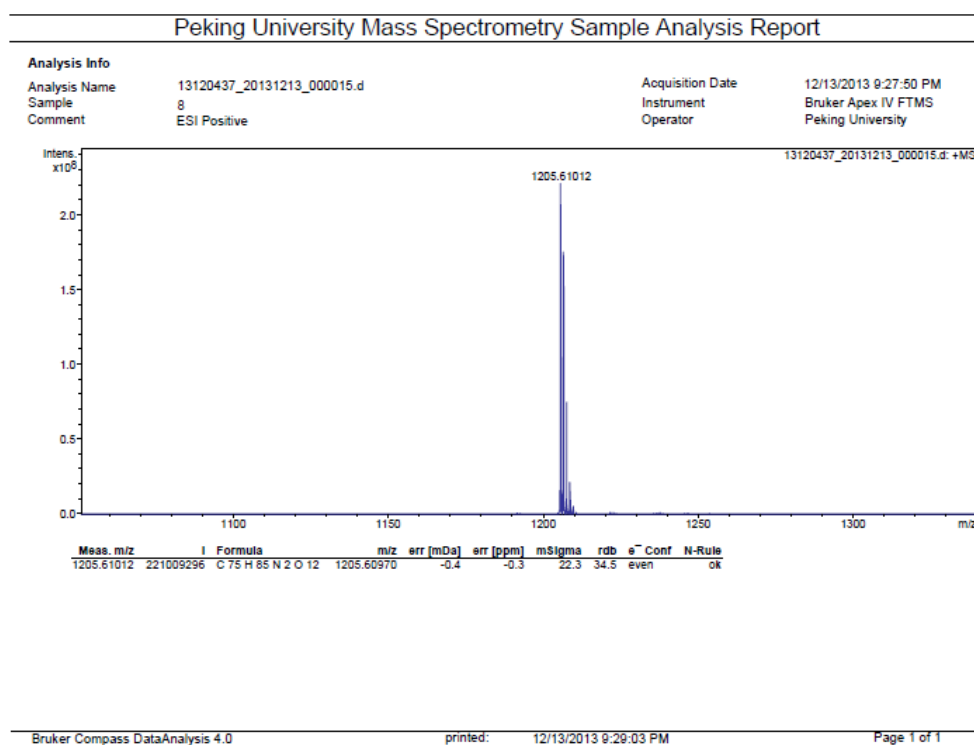

Figure S4(c). HR-ESI-MS spectra of Z-1 .

## Preparation of compound *E-1*.

*E-1* was produced by irradiating a solution of *Z-1* with a Xe lamp and a narrow band filter centered at  $387 \pm 5$  nm for about 2-2.5 h. The integral area of the proton signal (7.7 ppm) of *Z-1* in  $^1\text{H}$  NMR spectra is only about 3% of the integral area of *E-1* proton signal, which revealed the almost completely conversion.

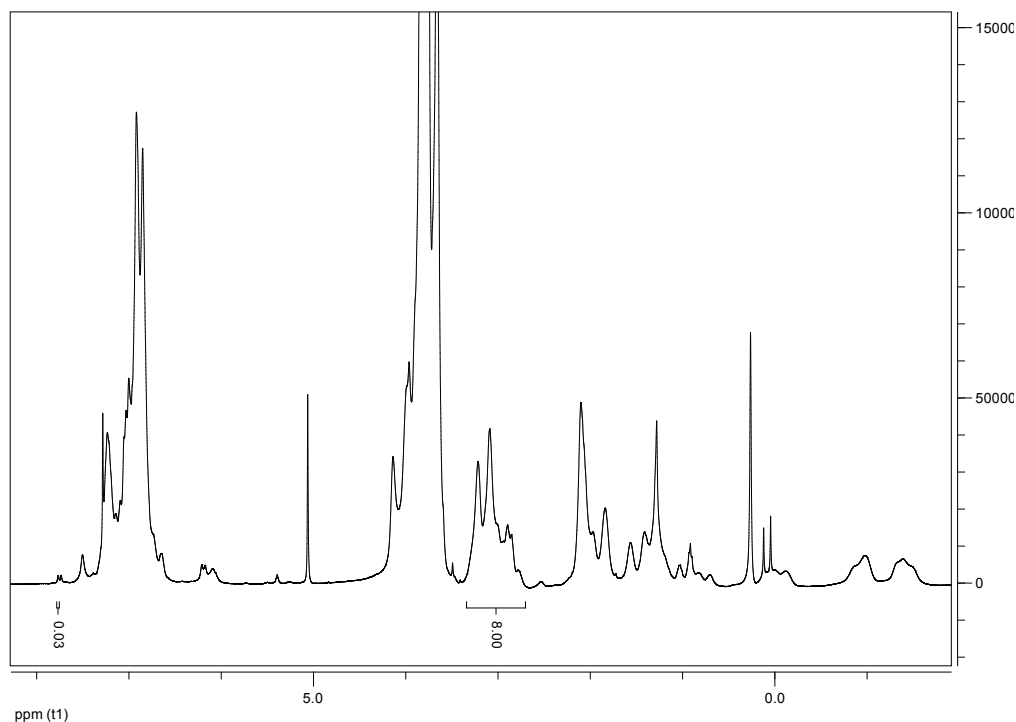

Figure S5.  $^1\text{H}$  NMR spectra (600 MHz,  $\text{CDCl}_3$ ) of *E-1*.

## 3. $^1\text{H}$ NMR spectra of *E-2*.

*E-2* was produced by irradiating a solution of protonated *Z-1* with a Xe lamp and a narrow band filter centered at  $387 \pm 5$  nm for about 2-2.5 h. The proton signal (7.7 ppm) of protonated *Z-1* in  $^1\text{H}$  NMR spectra is almost disappeared, which revealed the almost completely conversion.

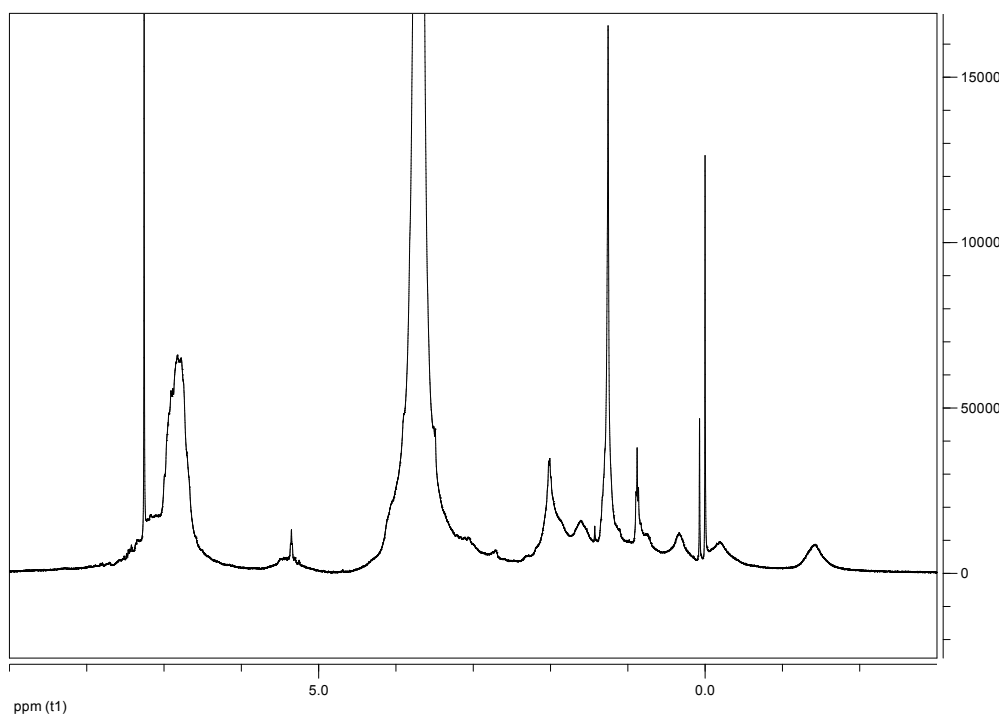

Figure S6.  $^1\text{H}$  NMR spectra (600 MHz,  $\text{CDCl}_3$ ) of *E*-2.

#### 4. $^1\text{H}$ NMR spectra of *Z*-1 at 5 mM.

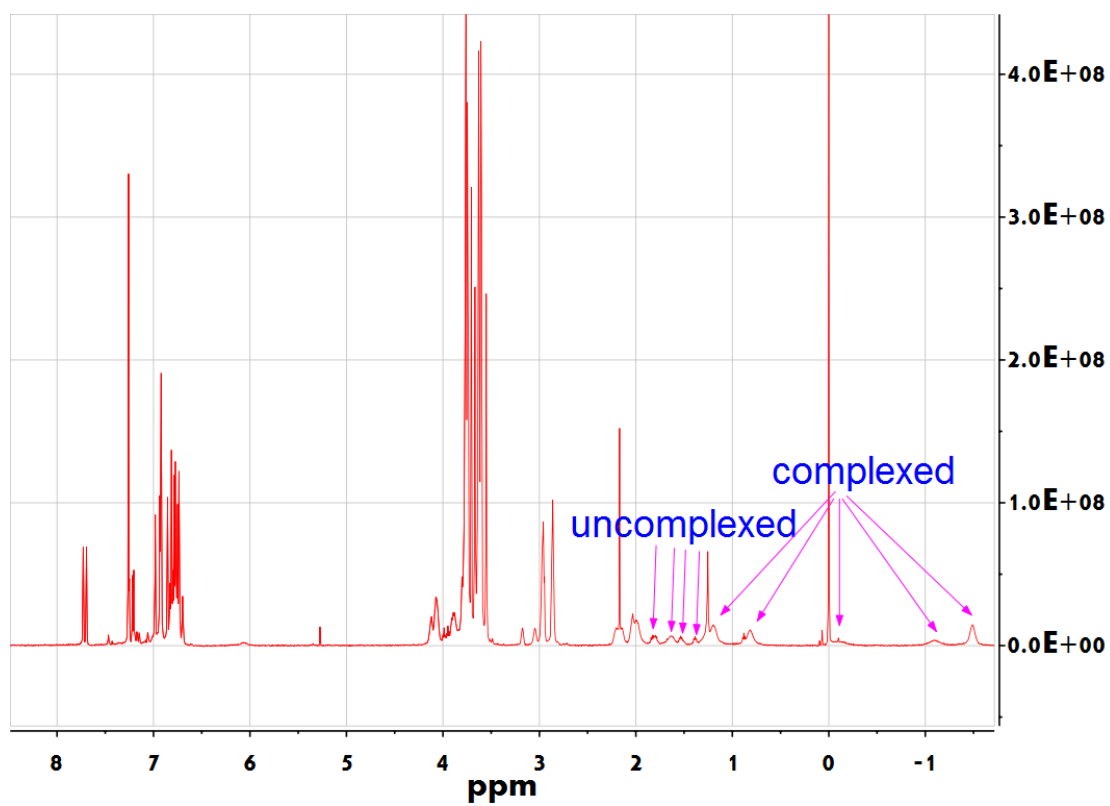

Figure S7.  $^1\text{H}$  NMR spectra (600 MHz,  $\text{CDCl}_3$ ) of *Z*-1 at 5 mM.

The  $^1\text{H}$  NMR spectra of **Z-1** at 5 mM showed large upfield shifts even below 0 ppm for the alkyl protons H2-H6, indicating the alkyl part entered into the cavity of pillar[5]arene. The uncomplexed signals of the alkyl protons at 2.0-1.5 ppm suggested the complexation was a slow-exchanging system.

## 5. 2-D COSY spectra of **Z-1** at 150 mM.

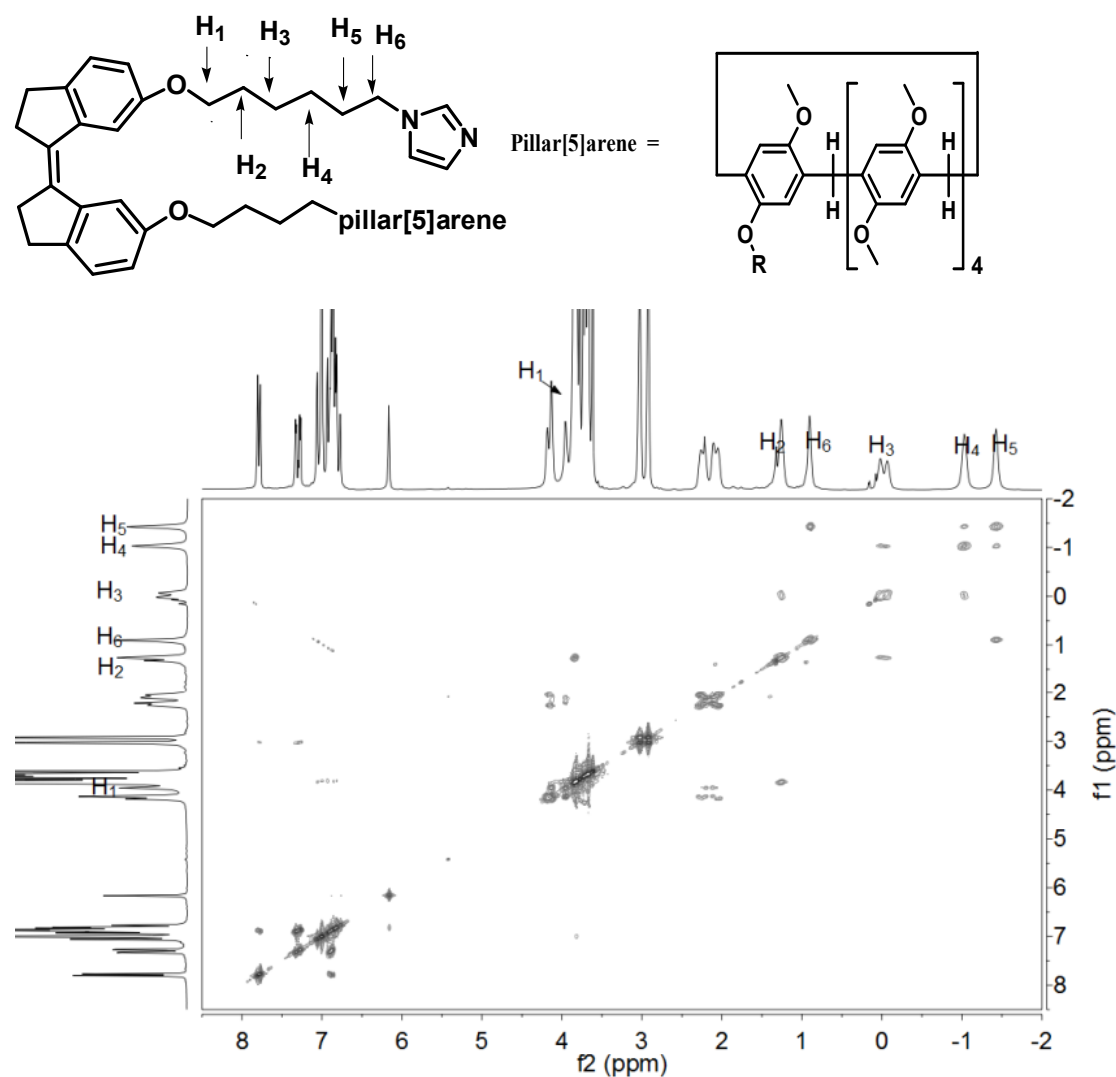

Figure S8. COSY spectrum of a chloroform-d solution of 150 mM **Z-1**.

## 6. DOSY spectra of Z-1 at 5-150 mM.

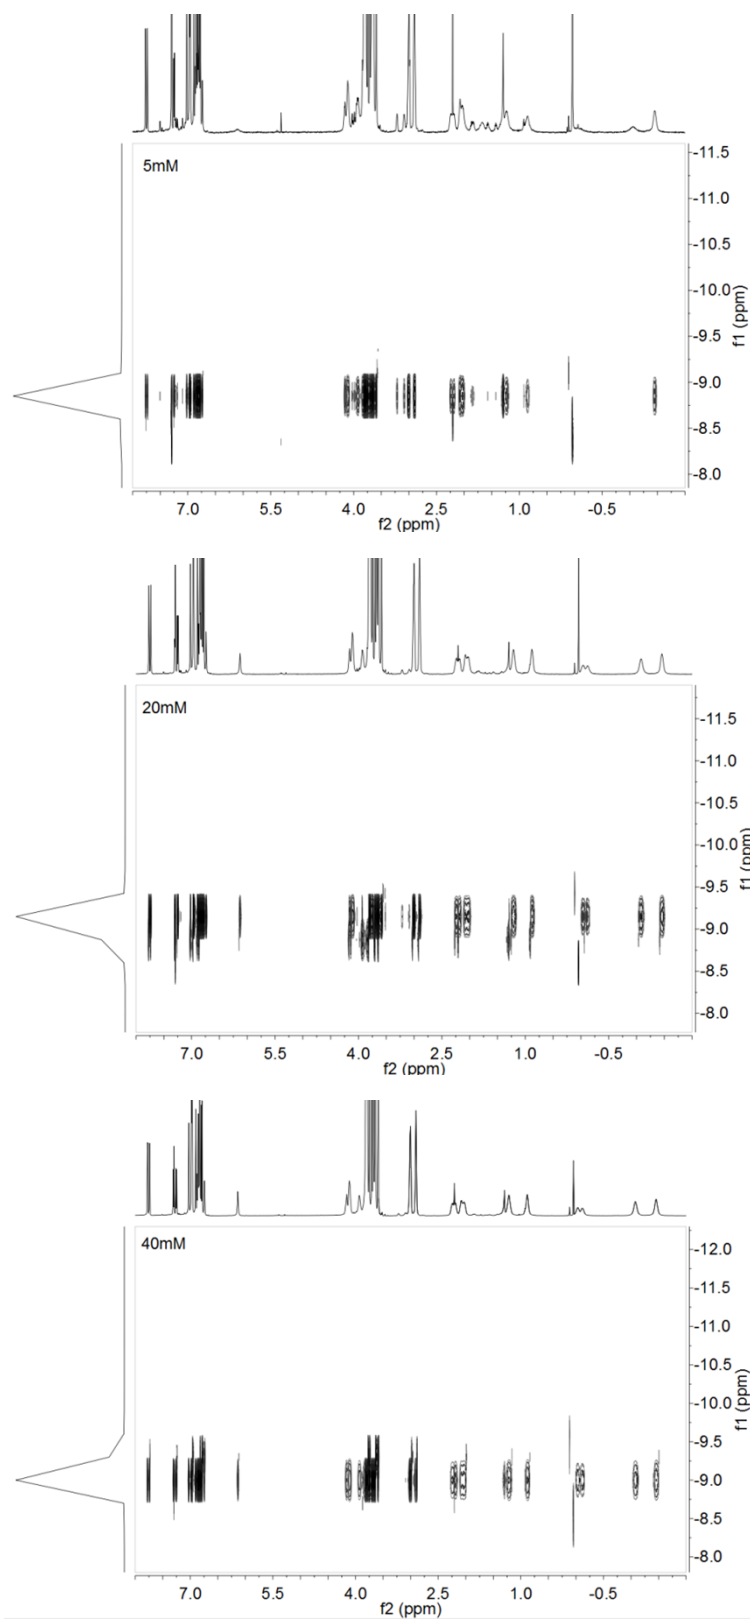



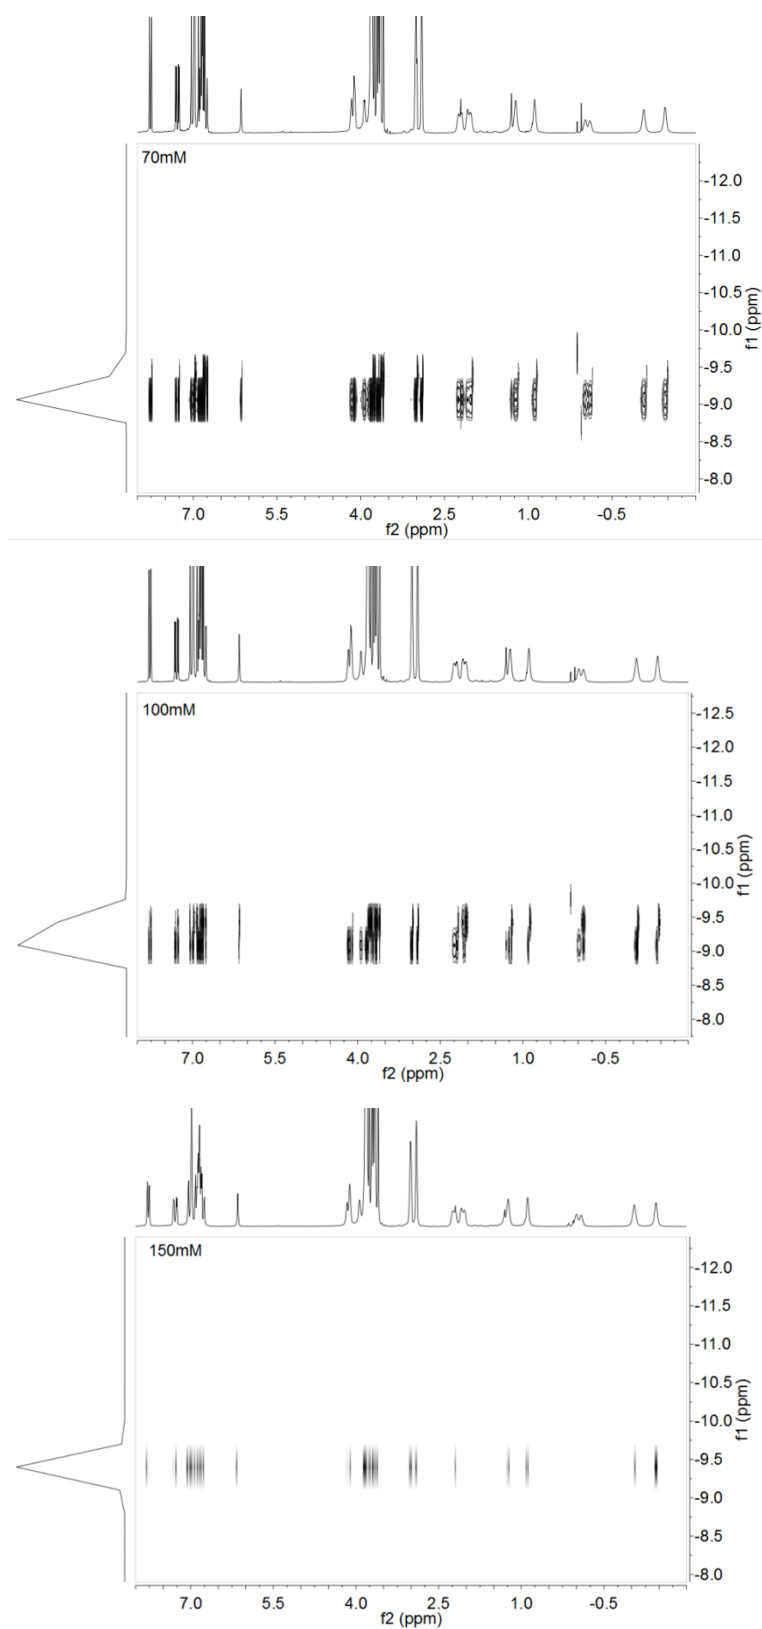

Figure S9. DOSY spectra of Z-1 at 5, 20, 40, 70, 100, 150 mM in CDCl<sub>3</sub>.

## 7. DOSY spectra of *E*-1 at 5-150 mM.

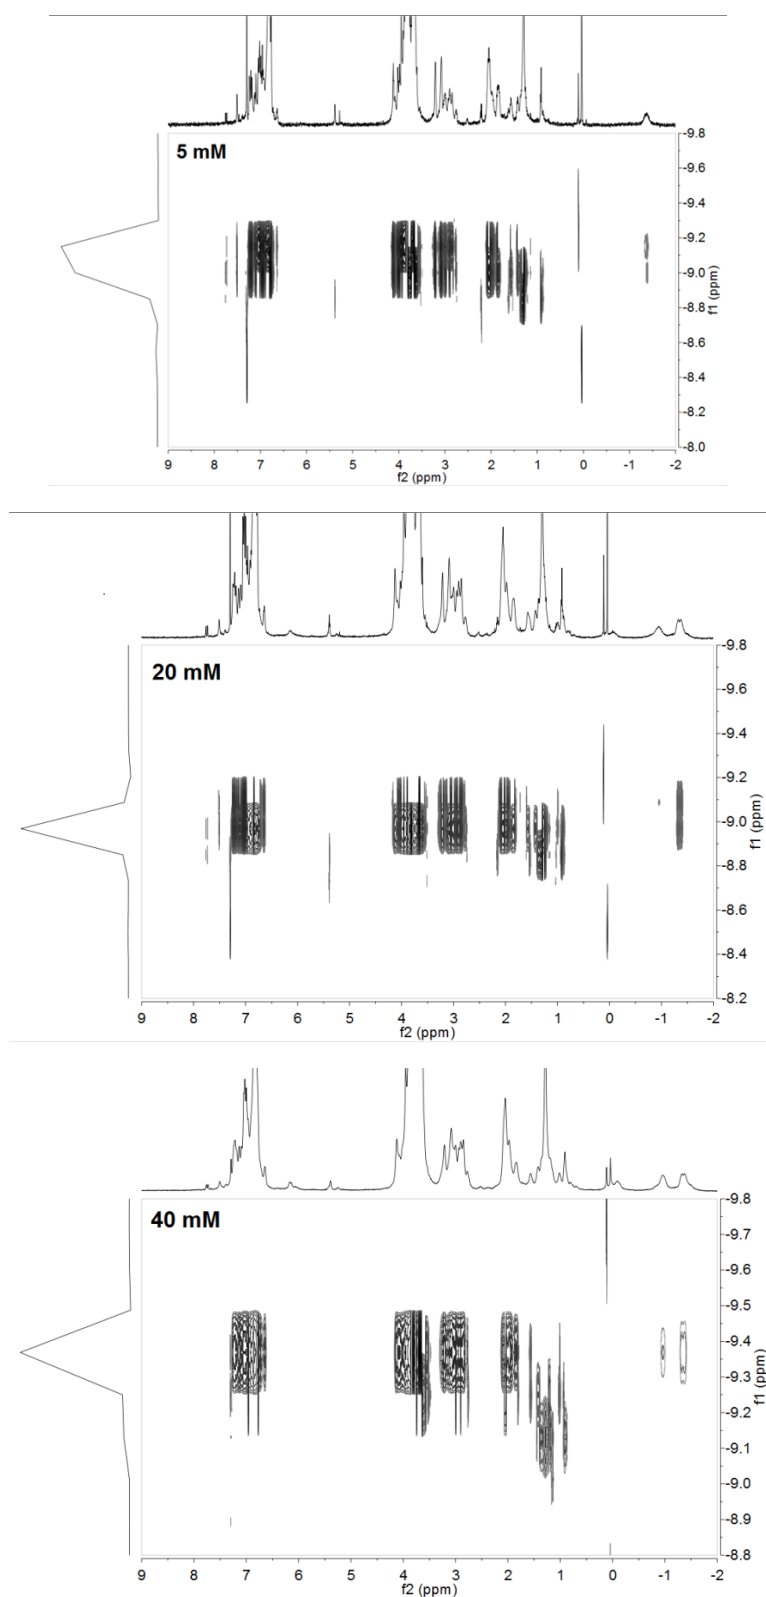

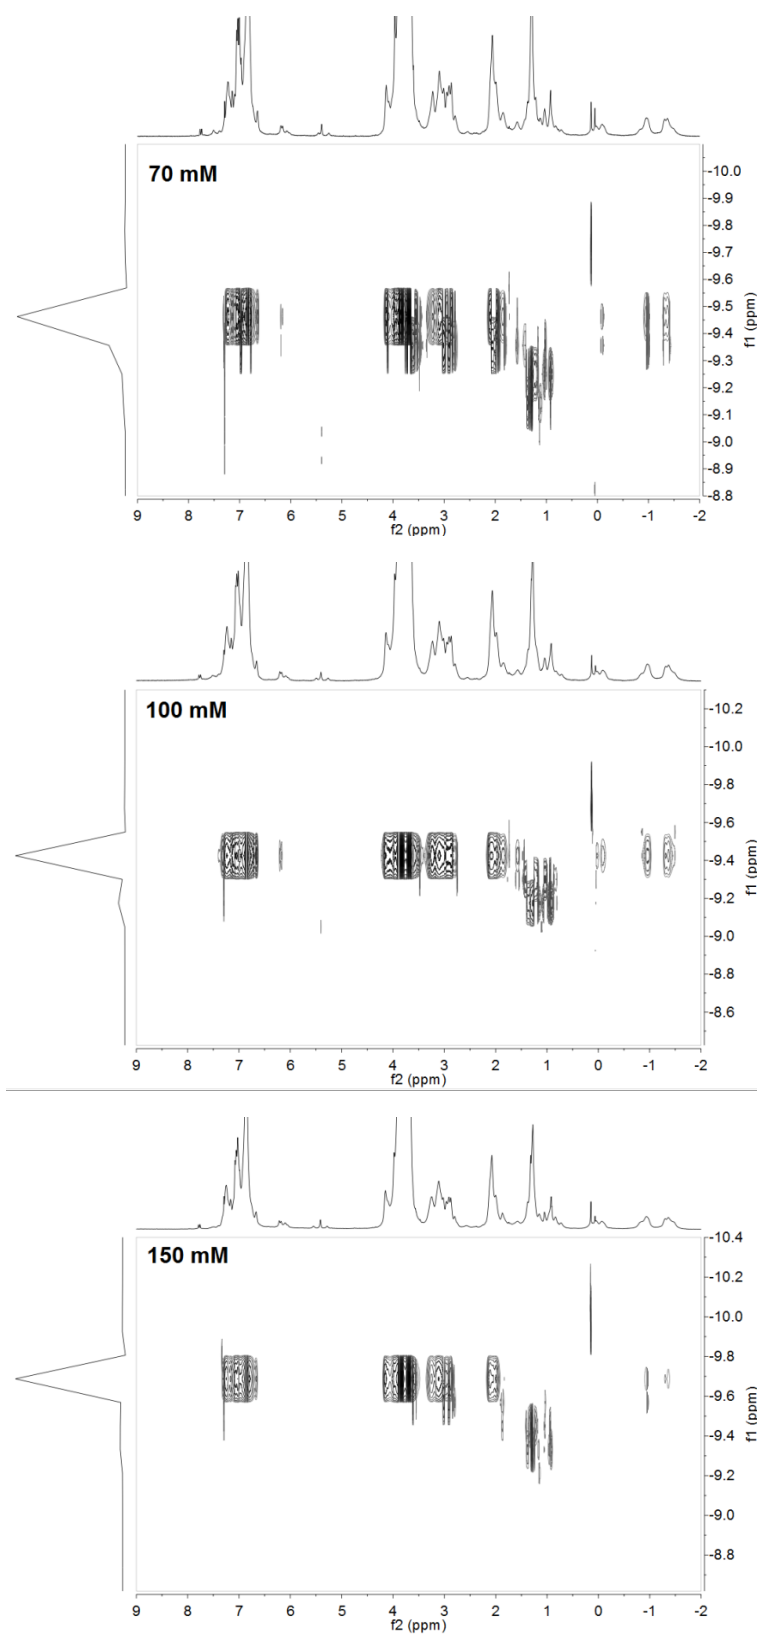

Figure S10. DOSY spectra of *E-1* at 5, 20, 40, 70, 100, 150 mM in CDCl<sub>3</sub>.

The 2-D DOSY spectra of *E-1* at 40-150 mM revealed several sets of signals with different diffusion coefficients, which indicated the

existence of several sizes of different aggregates. The observation of a sharp decrease in the diffusion coefficient upon concentration of *E-1* increasing suggested the formation of linear polymers.<sup>1</sup>

## 8. DOSY spectra of *E-2* at 5-150 mM.

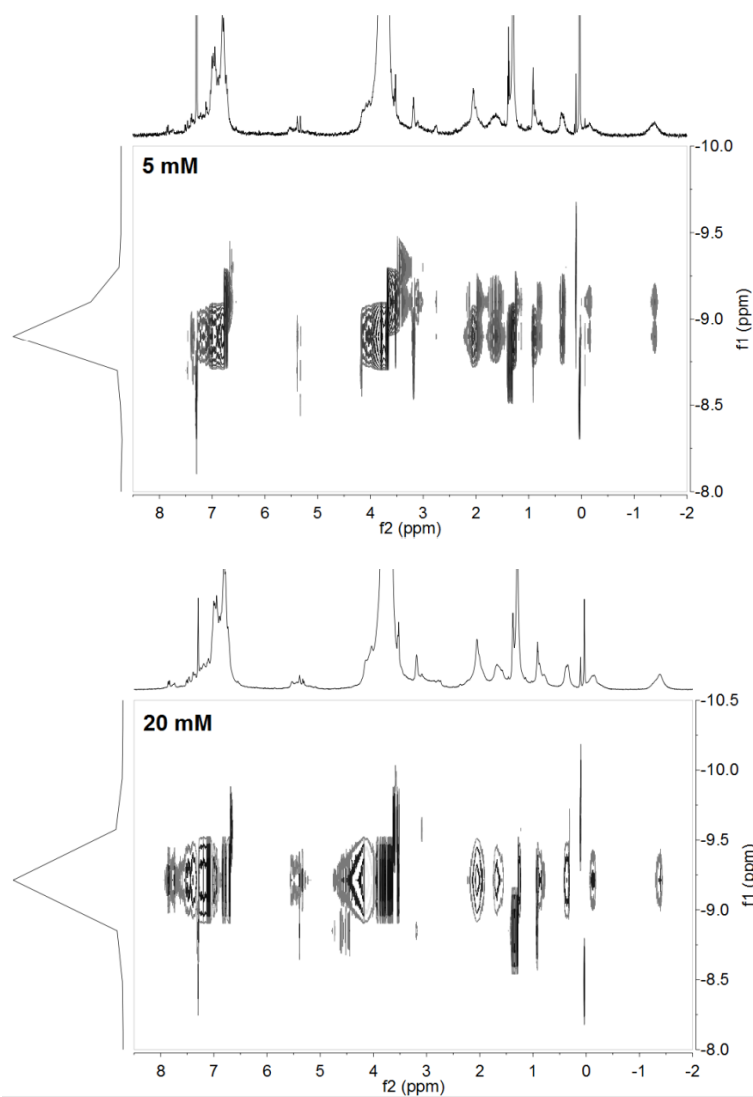

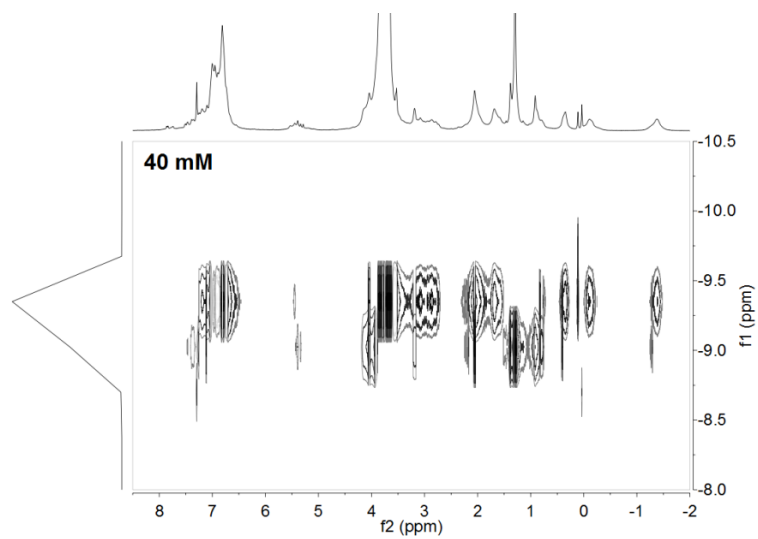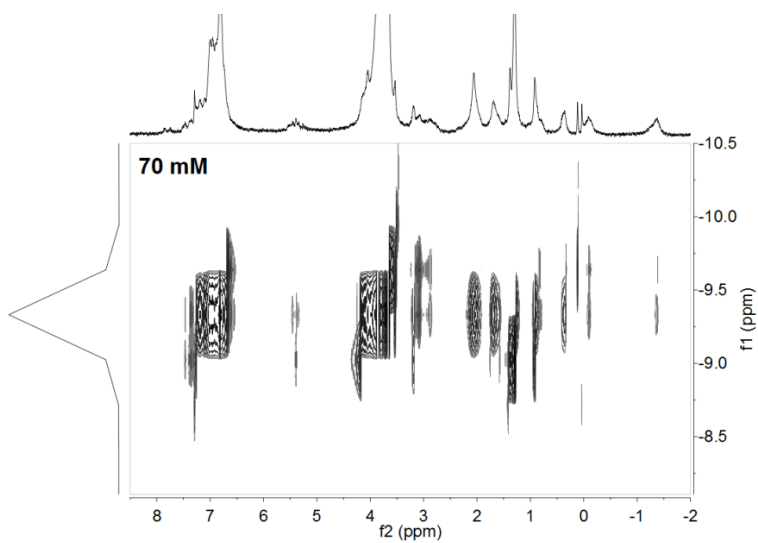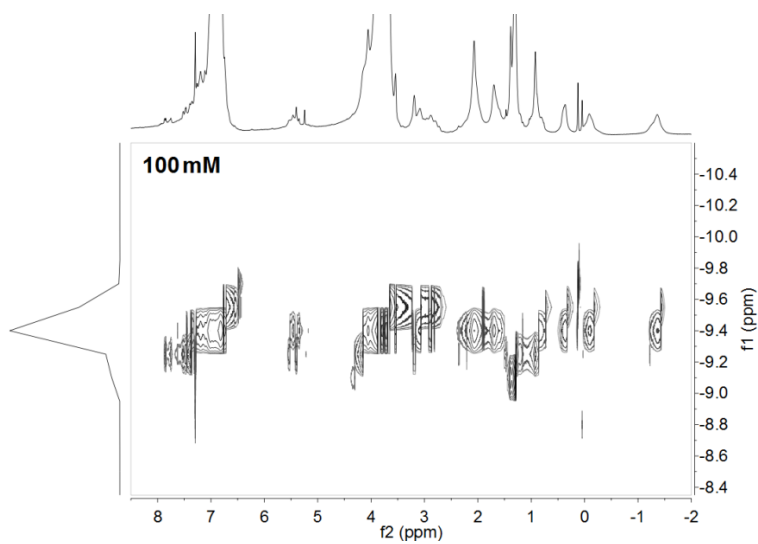

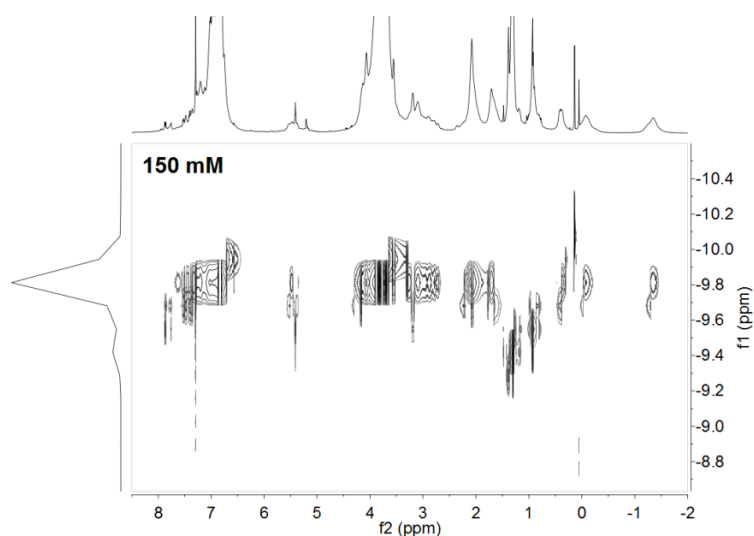

Figure S11. DOSY spectra of *E-2* at 5, 20, 40, 70, 100, 150 mM in CDCl<sub>3</sub>.

The 2-D DOSY spectra of *E-2* at 40-150 mM showed several sets of signals with different diffusion coefficients, demonstrating that there were several sizes of different aggregates in *E-2* system. When the concentration of *E-2* increases, the diffusion coefficient decreases significantly. The decrease is bigger than that of *E-1*, suggesting protonation of *E-1* increases its degree of polymerization.

## 9. Reference.

1. F. Wang, J. Q. Zhang, X. Ding, S. Y. Dong, M. Liu, B. Zheng, S. J. Li, L. Wu, Y. H. Yu, H. W. Gibson, F. H. Huang, *Angew. Chem., Int. Ed.*, 2010, **122**, 1108-1112.
